# Supplementary material
Source: Springer Nature journal article supplement (https://www.springermedizin.de/resource/supplementary/12913_2012_2643_MOESM4_ESM.pdf/9531042)
Supplement: MOESM4 [file 9531042]

GOAL and ACTION PLANNING SHEET

Name: .....

| SPECIFIC GOAL:<br><i>"This is the goal I'd like to achieve"</i> | OUTCOME                                     |
|-----------------------------------------------------------------|---------------------------------------------|
| Goal Number:                                                    | Date:                                       |
|                                                                 | Achieved <input type="checkbox"/>           |
|                                                                 | Partially achieved <input type="checkbox"/> |
| Date set:                                                       | Not Achieved <input type="checkbox"/>       |

| ACTION PLAN<br><i>"This is how I'm going to go about achieving it"</i>                                                | SUCCESS?                       | COMMENTS<br><i>"How did I get on?"</i> |
|-----------------------------------------------------------------------------------------------------------------------|--------------------------------|----------------------------------------|
| Date Set: _____ Target Date: _____<br><br><i>Confidence level 0 - 10<br/>Any barriers that might get in your way?</i> | YES<br><br>NO<br><br>NOT QUITE |                                        |
| Date Set: _____ Target Date: _____<br><br><i>Confidence level 0 - 10<br/>Any barriers that might get in your way?</i> | YES<br><br>NO<br><br>NOT QUITE |                                        |
| Date Set: _____ Target Date: _____<br><br><i>Confidence level 0 - 10<br/>Any barriers that might get in your way?</i> | YES<br><br>NO<br><br>NOT QUITE |                                        |
